# Supplementary material for: New organic–inorganic bromide (P(C4H9)4)2[ZnBr4]: crystal structure, vibrational properties, and electrical conduction behavior from impedance studies
Source: Royal Society of Chemistry journal article supplement (doi:10.1039/d6ra00849f), 2026-05-15
Supplement: d6ra00849f1.pdf [file d6ra00849f1.pdf]

## Supplementary Material for

### **New organic–inorganic bromide $(P(C_4H_9)_4)_2[ZnBr_4]$ : Crystal Structure, Vibrational Properties, and Electrical Conduction Behavior from Impedance Studies**

Molka Ezzedine<sup>1\*</sup>, Malika Ben Gzaiel<sup>1,2</sup>, Mohamed Tliha<sup>3</sup>, E. López-Lago<sup>4</sup>, Walid Rekik<sup>5</sup>, Ali Ben Ahmed<sup>6</sup>,  
Abderrazek Oueslati<sup>1</sup>

<sup>1</sup>*Laboratory of spectroscopic characterization and optical materials, Faculty of Sciences, University of Sfax, B.P. 1171, 3000 Sfax, Tunisia*

<sup>2</sup>*University of Gafsa, Higher Institute of Social Sciences and Education, 2119, Gafsa, Tunisia*

<sup>3</sup>*Departement of Physics, Al-Qunfudah University College, Umm Al-Qura University, Saida Arabia.*

<sup>4</sup>*Departamento de Física Aplicada, Facultad de Óptica e Optometría Instituto de Materiais (iMATUS) Campus Vida, Universidade de Santiago de Compostela (USC), 15782 Galicia, Spain*

<sup>5</sup>*Laboratory Physical-Chemistry of Solid state, Chemistry department, Faculty of Sciences of Sfax, University of Sfax, BP 1171, 3000, Sfax, Tunisia*

<sup>6</sup>*Laboratory of Applied Physic, Department of Physic, Faculty of Sciences of Sfax, University of Sfax, Sfax, Tunisia*

\* Corresponding author. E-mail address: [oueslatiabderrazek@yahoo.fr](mailto:oueslatiabderrazek@yahoo.fr)

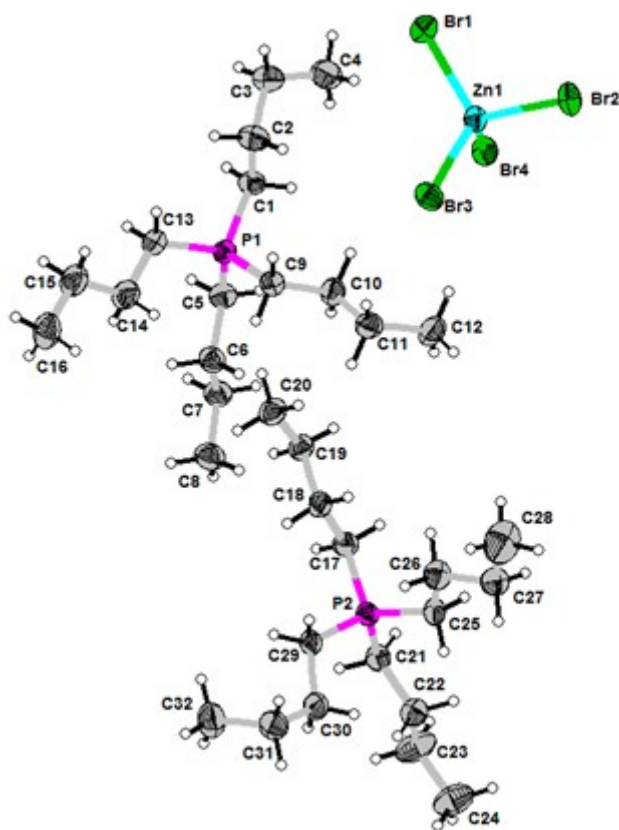

**Figure.S1:** The asymmetric unit of  $(\text{P}(\text{C}_4\text{H}_9)_4)_2[\text{ZnBr}_4]$ . Displacement ellipsoids are drawn at the 50 % probability level.

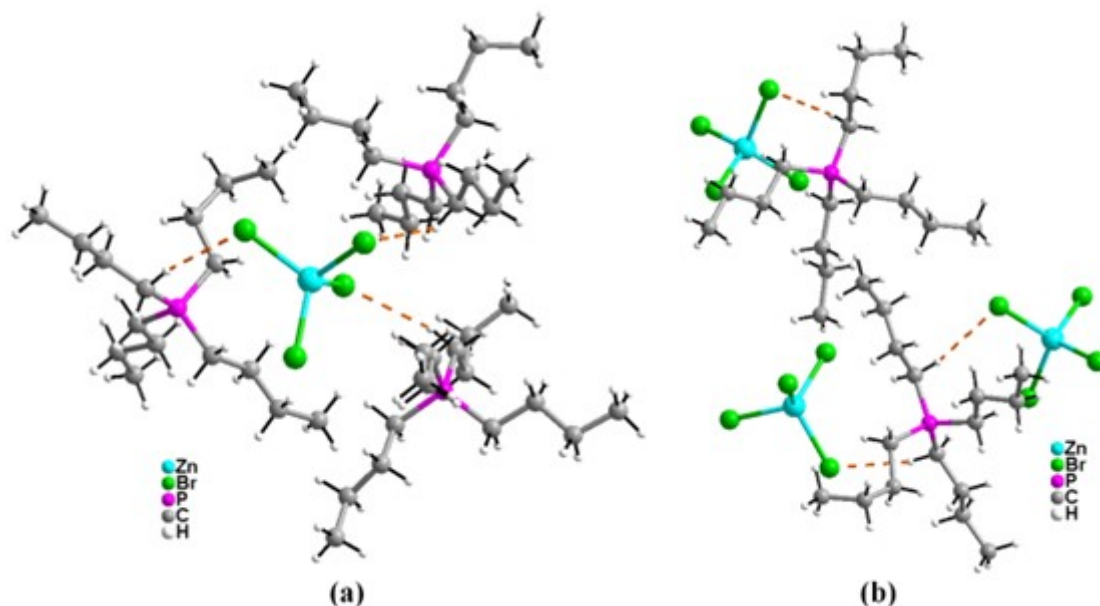

**Figure.S2:** Hydrogen bonds established by (a) the  $[\text{ZnBr}_4]^{2-}$  tetrahedron and (b) the  $(\text{P}(\text{C}_4\text{H}_9)_4)^+$  organic cations in  $(\text{P}(\text{C}_4\text{H}_9)_4)_2[\text{ZnBr}_4]$ .

**Table.S1.** Crystallographic data and structure refinements of  $(P(C_4H_9)_4)_2[ZnBr_4]$ .

| <b>Formula</b>                         | <b><math>(P(C_4H_9)_4)_2[ZnBr_4]</math></b>                                      |
|----------------------------------------|----------------------------------------------------------------------------------|
| Color/Shape                            | Colorless/plate                                                                  |
| Formula weight ( $g\text{mol}^{-1}$ )  | 903.84                                                                           |
| Crystal system                         | Monoclinic                                                                       |
| Space group                            | $P2_1/c$                                                                         |
| Density                                | 1.436                                                                            |
| Crystal size (mm)                      | 0.147x0.097x0.081                                                                |
| Diffractometer                         | Bruker D8 VENTURE<br>PHOTON III-14                                               |
| $a$ (Å)                                | 15.3260(11)                                                                      |
| $b$ (Å)                                | 17.6692(13)                                                                      |
| $c$ (Å)                                | 16.9898(11)                                                                      |
| $\beta$ (°)                            | 114.715(2)                                                                       |
| $V$ (Å <sup>3</sup> )                  | 4179.4(5)                                                                        |
| Z                                      | 4                                                                                |
| Radiation type                         | Mo-K $\alpha$ radiation                                                          |
| Absorption Correction                  | Multi-scan                                                                       |
| $\theta$ range for data collection (°) | 2.30-26.37                                                                       |
| Measured reflections                   | 208756                                                                           |
| Independent reflections                | 8537                                                                             |
| Observed data [ $I > 2\sigma(I)$ ]     | 7679                                                                             |
| Index ranges                           | $h = -19 \rightarrow 19$<br>$k = -22 \rightarrow 22$<br>$l = -21 \rightarrow 21$ |
| F(000)                                 | 1856                                                                             |
| Number of parameters                   | 361                                                                              |
| $R_1$                                  | 0.0271                                                                           |
| $wR_2$                                 | 0.0678                                                                           |
| Goof                                   | 1.038                                                                            |

**Table.S2.** Fractional atomic coordinates and equivalent isotropic temperature factors (Å<sup>2</sup>).

|            | <i>x</i>    | <i>y</i>    | <i>z</i>    | <i>U<sub>eq</sub></i> |
|------------|-------------|-------------|-------------|-----------------------|
| <b>Zn1</b> | 0.65420(2)  | 0.15810(2)  | 0.37603(2)  | 0.02149(7)            |
| <b>Br1</b> | 0.78652(2)  | 0.09569(2)  | 0.49072(2)  | 0.03014(7)            |
| <b>Br2</b> | 0.61901(2)  | 0.08458(2)  | 0.24643(2)  | 0.02798(7)            |
| <b>Br3</b> | 0.51168(2)  | 0.17458(2)  | 0.40180(2)  | 0.02755(7)            |
| <b>Br4</b> | 0.70834(2)  | 0.28467(2)  | 0.35883(2)  | 0.02589(7)            |
| <b>P1</b>  | 0.40297(4)  | 0.16711(4)  | 0.66137(4)  | 0.01925(13)           |
| <b>C1</b>  | 0.50930(18) | 0.12964(14) | 0.65638(17) | 0.0227(5)             |
| <b>C2</b>  | 0.52069(19) | 0.04391(15) | 0.66919(19) | 0.0279(6)             |
| <b>C3</b>  | 0.61885(19) | 0.01754(16) | 0.67799(19) | 0.0292(6)             |
| <b>C4</b>  | 0.6344(2)   | 0.02937(18) | 0.5974(2)   | 0.0358(7)             |
| <b>C5</b>  | 0.40778(18) | 0.26817(14) | 0.65052(17) | 0.0231(5)             |
| <b>C6</b>  | 0.31632(19) | 0.31142(14) | 0.63607(17) | 0.0245(5)             |
| <b>C7</b>  | 0.3250(2)   | 0.39445(15) | 0.61801(18) | 0.0266(5)             |
| <b>C8</b>  | 0.2326(2)   | 0.43819(16) | 0.59941(19) | 0.0317(6)             |
| <b>C9</b>  | 0.29741(17) | 0.12948(14) | 0.57376(15) | 0.0214(5)             |
| <b>C10</b> | 0.29277(18) | 0.14800(16) | 0.48376(16) | 0.0247(5)             |
| <b>C11</b> | 0.19686(19) | 0.12372(16) | 0.41237(17) | 0.0269(5)             |
| <b>C12</b> | 0.1923(2)   | 0.13596(17) | 0.32165(17) | 0.0341(6)             |
| <b>C13</b> | 0.40190(19) | 0.14032(16) | 0.76324(16) | 0.0253(5)             |
| <b>C14</b> | 0.3132(2)   | 0.16019(17) | 0.77735(18) | 0.0299(6)             |
| <b>C15</b> | 0.3090(2)   | 0.1207(2)   | 0.85428(19) | 0.0370(7)             |
| <b>C16</b> | 0.2194(2)   | 0.1357(2)   | 0.86711(19) | 0.0368(7)             |
| <b>P2</b>  | 0.17350(5)  | 0.73170(4)  | 0.32028(4)  | 0.01961(13)           |
| <b>C17</b> | 0.29628(18) | 0.70601(14) | 0.38587(16) | 0.0229(5)             |
| <b>C18</b> | 0.31002(18) | 0.63184(14) | 0.43629(16) | 0.0229(5)             |
| <b>C19</b> | 0.41551(18) | 0.61586(14) | 0.49224(16) | 0.0239(5)             |
| <b>C20</b> | 0.4270(2)   | 0.54459(15) | 0.54598(17) | 0.0275(6)             |
| <b>C21</b> | 0.17462(19) | 0.82967(14) | 0.29143(16) | 0.0228(5)             |
| <b>C22</b> | 0.08710(19) | 0.85981(15) | 0.21422(17) | 0.0258(5)             |
| <b>C23</b> | 0.0951(2)   | 0.94384(17) | 0.2022(2)   | 0.0393(7)             |
| <b>C24</b> | 0.0124(2)   | 0.97585(19) | 0.1238(2)   | 0.0424(8)             |
| <b>C25</b> | 0.12101(19) | 0.67718(14) | 0.22123(16) | 0.0228(5)             |
| <b>C26</b> | 0.1159(2)   | 0.59156(15) | 0.22873(17) | 0.0275(6)             |
| <b>C27</b> | 0.0631(2)   | 0.55536(15) | 0.14013(18) | 0.0280(6)             |
| <b>C28</b> | 0.0631(3)   | 0.46992(19) | 0.1424(2)   | 0.0542(10)            |
| <b>C29</b> | 0.10507(18) | 0.71861(14) | 0.38435(16) | 0.0226(5)             |
| <b>C30</b> | 0.00627(19) | 0.75490(16) | 0.34704(17) | 0.0267(5)             |
| <b>C31</b> | -0.0544(2)  | 0.72982(17) | 0.39473(18) | 0.0307(6)             |
| <b>C32</b> | -0.0149(2)  | 0.7555(2)   | 0.48794(19) | 0.0386(7)             |

**Table.S3.** Selected bond distances (Å) and angles (°).

| Distances (Å) | Angles (°) |             |             |
|---------------|------------|-------------|-------------|
| Zn1-Br1       | 2.4127(4)  | Br1-Zn1-Br2 | 106.402(15) |

|                |           |                    |             |
|----------------|-----------|--------------------|-------------|
| <b>Zn1-Br2</b> | 2.4152(4) | <b>Br1-Zn1-Br3</b> | 115.254(15) |
| <b>Zn1-Br3</b> | 2.4181(4) | <b>Br2-Zn1-Br3</b> | 110.828(15) |
| <b>Zn1-Br4</b> | 2.4450(4) | <b>Br1-Zn1-Br4</b> | 107.574(15) |
| <b>P1-C1</b>   | 1.793(3)  | <b>Br2-Zn1-Br4</b> | 109.913(14) |
| <b>P1-C5</b>   | 1.800(3)  | <b>Br3-Zn1-Br4</b> | 106.787(14) |
| <b>P1-C13</b>  | 1.801(3)  | <b>C1-P1-C5</b>    | 106.52(12)  |
| <b>P1-C9</b>   | 1.806(2)  | <b>C1-P1-C13</b>   | 108.78(12)  |
| <b>C1-C2</b>   | 1.530(4)  | <b>C5-P1-C13</b>   | 112.12(13)  |
| <b>C2-C3</b>   | 1.521(4)  | <b>C1-P1-C9</b>    | 110.10(12)  |
| <b>C3-C4</b>   | 1.500(4)  | <b>C5-P1-C9</b>    | 109.99(12)  |
| <b>C5-C6</b>   | 1.524(3)  | <b>C13-P1-C9</b>   | 109.29(12)  |
| <b>C6-C7</b>   | 1.516(4)  | <b>C2-C1-P1</b>    | 114.25(18)  |
| <b>C7-C8</b>   | 1.526(4)  | <b>C3-C2-C1</b>    | 111.5(2)    |
| <b>C9-C10</b>  | 1.536(3)  | <b>C4-C3-C2</b>    | 113.3(2)    |
| <b>C10-C11</b> | 1.525(3)  | <b>C6-C5-P1</b>    | 116.09(18)  |
| <b>C11-C12</b> | 1.529(4)  | <b>C7-C6-C5</b>    | 111.4(2)    |
| <b>C13-C14</b> | 1.517(4)  | <b>C6-C7-C8</b>    | 112.3(2)    |
| <b>C14-C15</b> | 1.507(4)  | <b>C10-C9-P1</b>   | 113.25(17)  |
| <b>C15-C16</b> | 1.502(4)  | <b>C11-C10-C9</b>  | 111.1(2)    |
| <b>P2-C17</b>  | 1.799(3)  | <b>C10-C11-C12</b> | 112.6(2)    |
| <b>P2-C21</b>  | 1.801(3)  | <b>C14-C13-P1</b>  | 117.37(18)  |
| <b>P2-C25</b>  | 1.810(2)  | <b>C15-C14-C13</b> | 113.3(2)    |
| <b>P2-C29</b>  | 1.815(3)  | <b>C16-C15-C14</b> | 114.7(2)    |
| <b>C17-C18</b> | 1.531(3)  | <b>C17-P2-C21</b>  | 106.53(12)  |
| <b>C18-C19</b> | 1.521(3)  | <b>C17-P2-C25</b>  | 112.64(12)  |
| <b>C19-C20</b> | 1.522(3)  | <b>C21-P2-C25</b>  | 108.04(12)  |
| <b>C21-C22</b> | 1.527(4)  | <b>C17-P2-C29</b>  | 108.27(12)  |
| <b>C22-C23</b> | 1.511(4)  | <b>C21-P2-C29</b>  | 111.06(12)  |
| <b>C23-C24</b> | 1.513(4)  | <b>C25-P2-C29</b>  | 110.26(12)  |
| <b>C25-C26</b> | 1.523(4)  | <b>C18-C17-P2</b>  | 115.22(18)  |
| <b>C26-C27</b> | 1.520(4)  | <b>C19-C18-C17</b> | 111.7(2)    |
| <b>C27-C28</b> | 1.510(4)  | <b>C18-C19-C20</b> | 110.8(2)    |
| <b>C29-C30</b> | 1.518(4)  | <b>C22-C21-P2</b>  | 117.65(18)  |
| <b>C30-C31</b> | 1.531(4)  | <b>C23-C22-C21</b> | 111.5(2)    |
| <b>C31-C32</b> | 1.510(4)  | <b>C22-C23-C24</b> | 113.6(3)    |
|                |           | <b>C26-C25-P2</b>  | 117.99(18)  |
|                |           | <b>C27-C26-C25</b> | 111.1(2)    |
|                |           | <b>C28-C27-C26</b> | 113.6(2)    |
|                |           | <b>C30-C29-P2</b>  | 114.93(17)  |
|                |           | <b>C29-C30-C31</b> | 112.1(2)    |
|                |           | <b>C32-C31-C30</b> | 113.7(2)    |

**Table.S4.** C-H...Br interaction geometry (Å, °).

| <b>D—H...A</b>                  | <b>D—H</b> | <b>H...A</b> | <b>D...A</b> | <b>D—H...A</b> |
|---------------------------------|------------|--------------|--------------|----------------|
| <b>C1-H1B...Br4<sup>i</sup></b> | 0.99       | 2.86         | 3.828(3)     | 165.9          |

|                                     |      |      |          |       |
|-------------------------------------|------|------|----------|-------|
| <b>C17-H17A...Br2<sup>ii</sup></b>  | 0.99 | 2.92 | 3.712(3) | 138.1 |
| <b>C21-H21A...Br1<sup>iii</sup></b> | 0.99 | 2.78 | 3.735(3) | 162.3 |

**Symmetry codes** : <sup>i</sup> x, -y+1/2, z+1/2; <sup>ii</sup> -x+1, y+1/2, -z+1/2; <sup>iii</sup> -x+1, -y+1, -z+1

**Table.S5.** Jonscher Law parameters for  $(P(C_4H_9)_4)_2[ZnBr_4]$  at different temperatures.

| <b>T (K)</b> | <b>s</b> | <b><math>\sigma_{dc}</math> (<math>\times 10^{-8} \Omega^{-1} \cdot \text{cm}^{-1}</math>)</b> | <b>A (<math>\times 10^{-13}</math>)</b> | <b>R<sup>2</sup></b> |
|--------------|----------|------------------------------------------------------------------------------------------------|-----------------------------------------|----------------------|
| <b>303</b>   | 0.9056   | 3.190                                                                                          | 7.513                                   | 0.99201              |
| <b>308</b>   | 0.9035   | 4.285                                                                                          | 8.878                                   | 0.99151              |
| <b>313</b>   | 0.8967   | 5.445                                                                                          | 9.164                                   | 0.99288              |
| <b>318</b>   | 0.8960   | 7.180                                                                                          | 9.90                                    | 0.99360              |
| <b>323</b>   | 0.8904   | 10.190                                                                                         | 11.60                                   | 0.99650              |
| <b>328</b>   | 0.8740   | 17.079                                                                                         | 15.98                                   | 0.99837              |
